# Supplementary material
Source: Springer Nature journal article supplement (https://www.springermedizin.de/resource/supplementary/12916_2012_662_MOESM5_ESM.pdf/9597936)

# Male

## F1

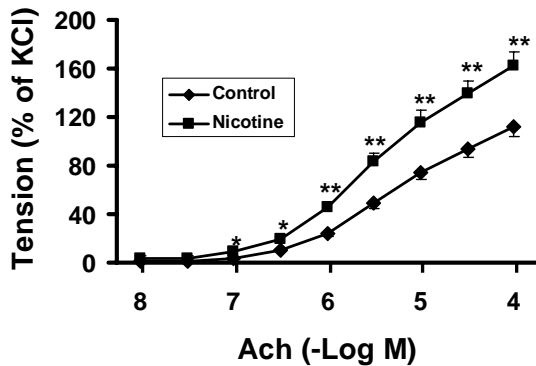

# Female

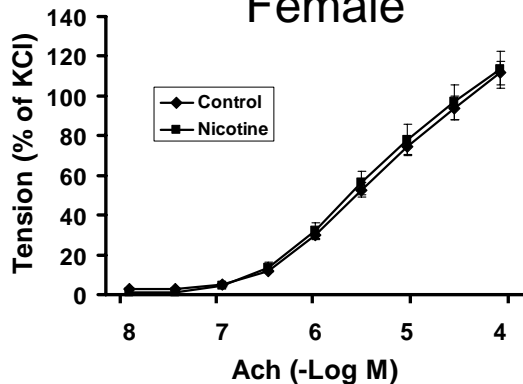

## F2

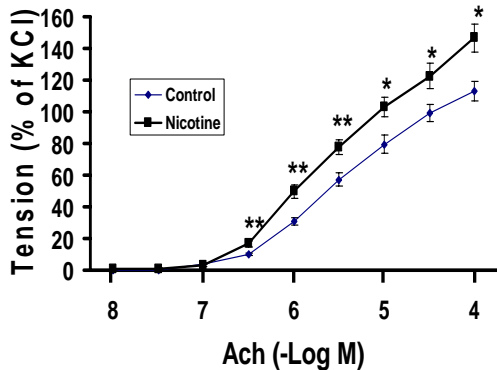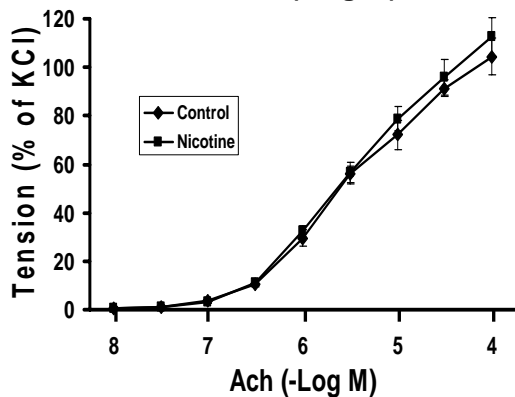

Supplement: MOESM5 [file 9597936]
